# Supplementary material for: Translation, but not transfection limits clinically relevant, exogenous mRNA based induction of alpha-4 integrin expression on human mesenchymal stem cells
Source: PubMed Central journal article supplement (PMC5430815; doi:10.1038/s41598-017-01304-3), 2017-04-24

**Translation, but not transfection limits clinically relevant, exogenous mRNA based induction of alpha-4 integrin expression on human mesenchymal stem cells**

Adam Nowakowski<sup>1</sup>, Anna Andrzejewska<sup>1</sup>, Johannes Boltze<sup>2,3,4,5</sup>, Franziska Nitzsche<sup>2,3</sup>, Li-li Cui<sup>6</sup>, Jukka Jolkkonen<sup>6,7</sup>, Piotr Walczak<sup>7,8,9</sup>, Barbara Lukomska<sup>1</sup>, Mirosław Janowski<sup>1,8,10</sup>

*1 NeuroRepair Department, Mossakowski Medical Research Centre, Polish Academy of Sciences, Warsaw, Poland, 2 Fraunhofer-Institute for Cell Therapy and Immunology, Department of Cell Therapy, University of Leipzig, Leipzig, Germany, 3 Translational Centre for Regenerative Medicine, University of Leipzig, Leipzig, Germany, 4 Fraunhofer Research Institution of Marine Biotechnology, Department of Translational Medicine, University of Lubeck, Lubeck, Germany, 5 Cell Technology, Lübeck, German; Institute for Medical and Marine Biotechnology, University of Lübeck, Lübeck, Germany, 6 Stroke Recovery Laboratory, Institute of Clinical Medicine - Neurology, University of Eastern Finland, Kuopio, Finland, 7 Neurocenter, Neurology, University Hospital of Kuopio, Kuopio, Finland, 8 Russell H. Morgan Dept. of Radiology and Radiological Science, Division of MR Research, 9 Institute for Cell Engineering, The Johns Hopkins University School of Medicine, Baltimore, USA, 10 Department of Radiology, Faculty of Medical Sciences, University of Warmia and Mazury, Olsztyn, Poland*

*\*Corresponding author: mjanows1@jhmi.edu*

**running head: mRNA-based approach to alpha-4 integrin**

''

**keywords: mRNA, ARCA, transfection, stroke, mesenchymal stem cells**

1 **Supplementary figure 1. Overview of the experiments (graphical abstract)**

2 **Supplementary figure 2. pITGA4-SP72 plasmid template DNA preparation with subsequent**  
3 **verification of ITGA4-mRNA production *in vitro***

4 *E.coli* were transfected with pITGA4-SP72 and obtained selected clones were digested with  
5 XbaI/XhoI to confirm proper subcloning from pITGA4 to pSP72 (A). The cloning site was verified by  
6 sequencing (B). Selected clone pITGA4-SP72 was employed for ITGA4-mRNA production *in vitro*  
7 (C).

8 **Supplementary figure 3. ITGA4 protein synthesis after ITGA4-mRNA transfection**

9 Immunocytochemical assessment of ITGA4 protein presence after ITGA4-mRNA bearing natural 7-  
10 methylguanosine cap transfection using Lipofectamine®2000.

11

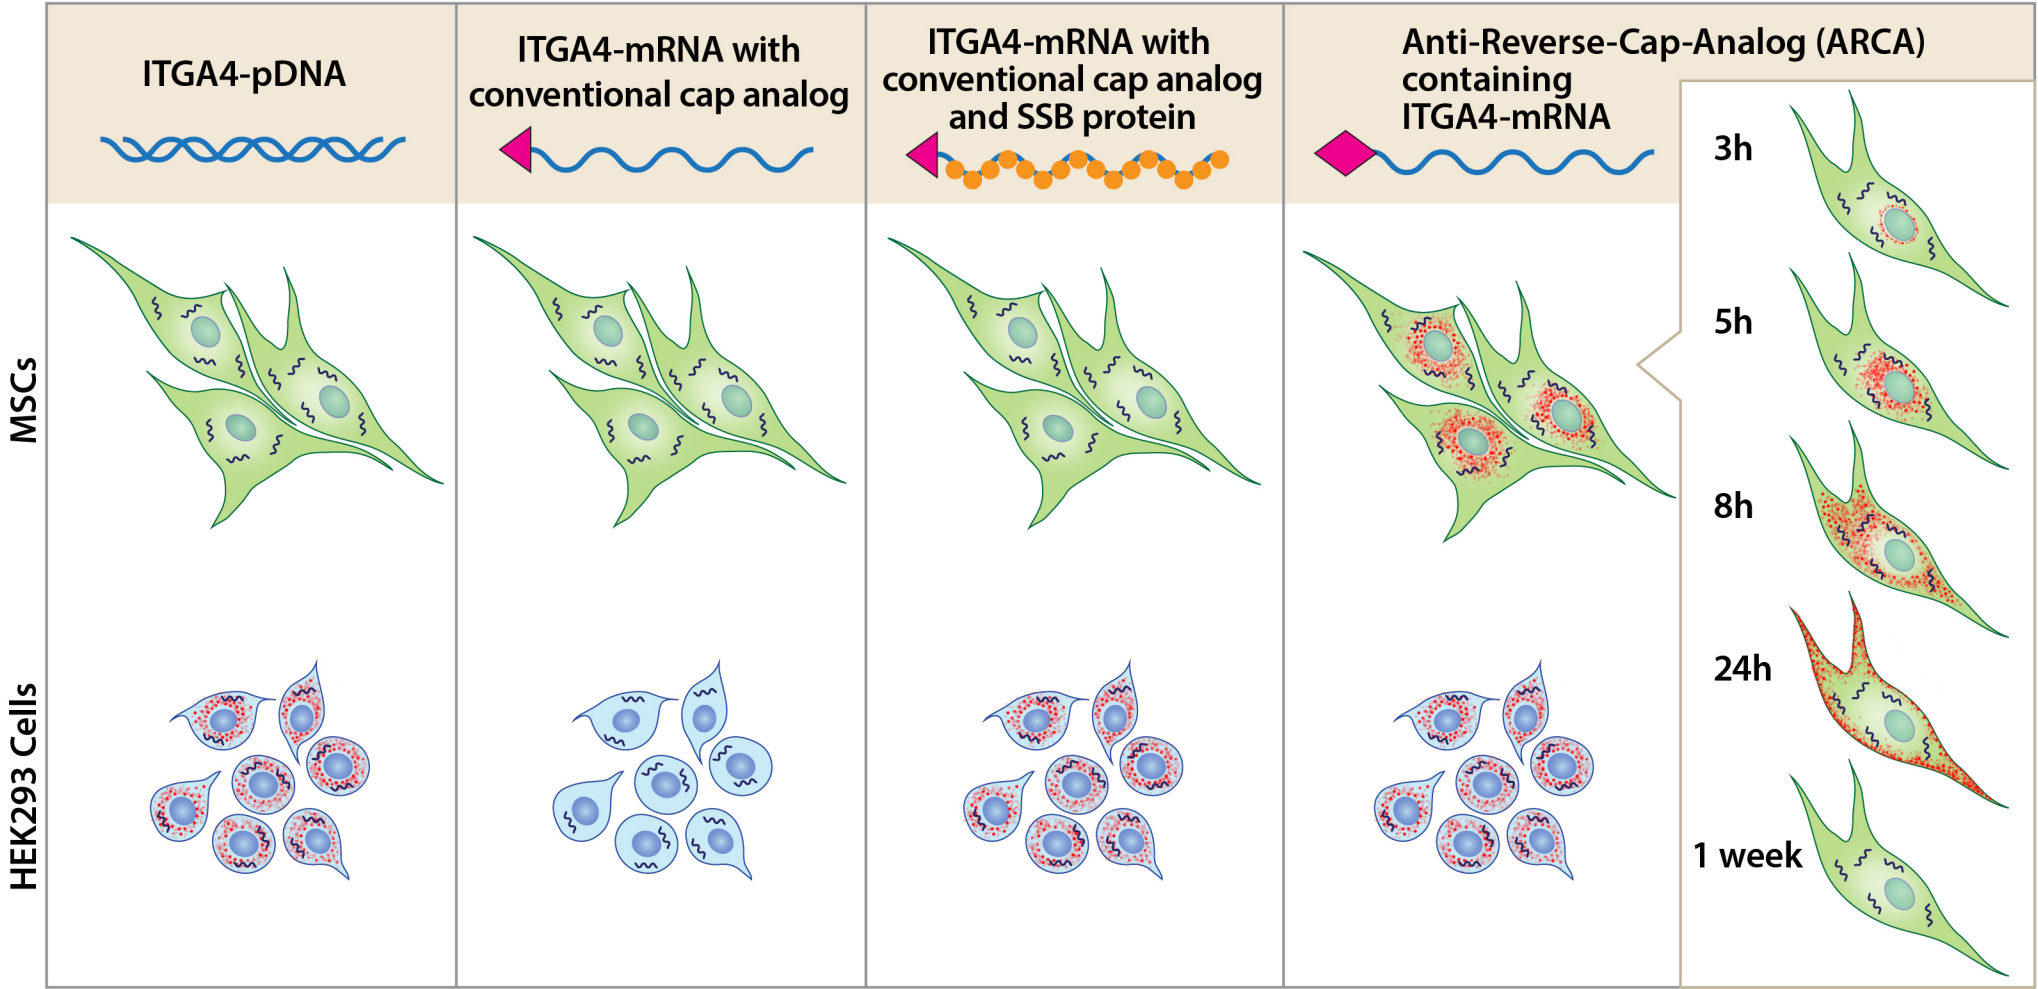

Nucleic acids

ITGA4 proteins

SSB protein

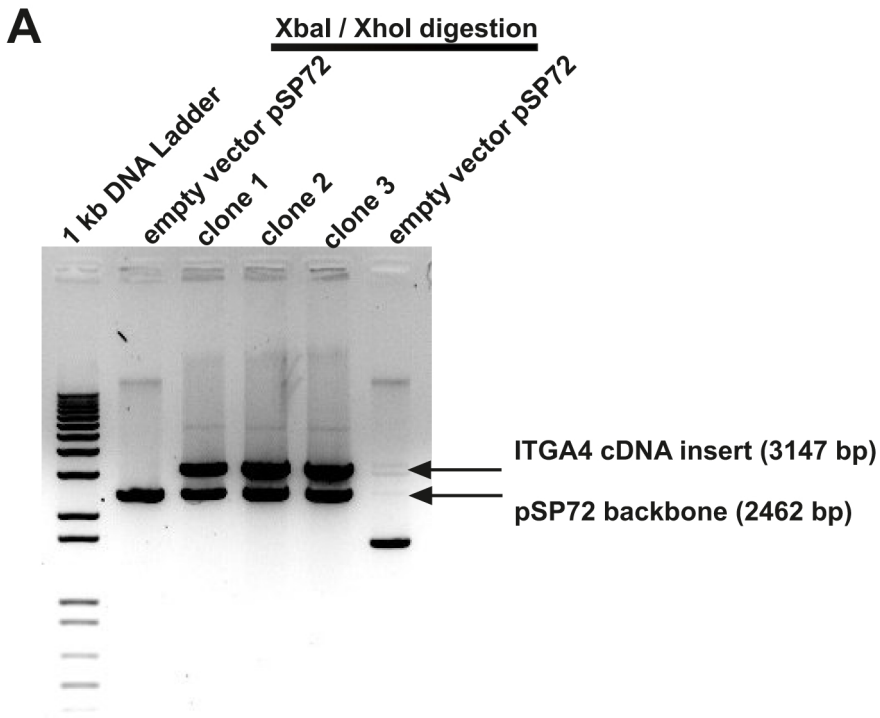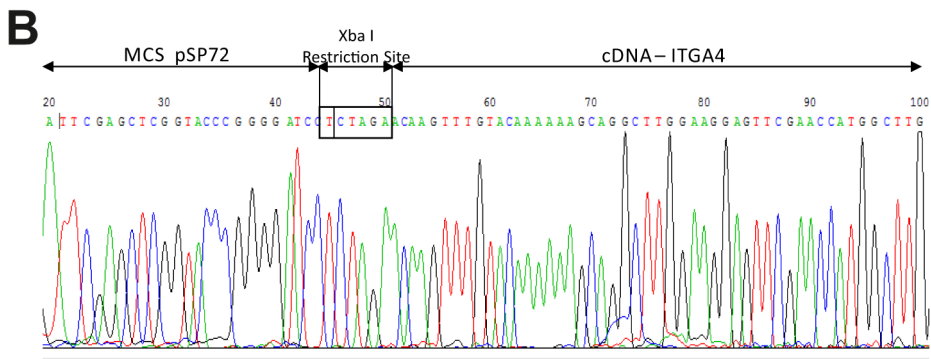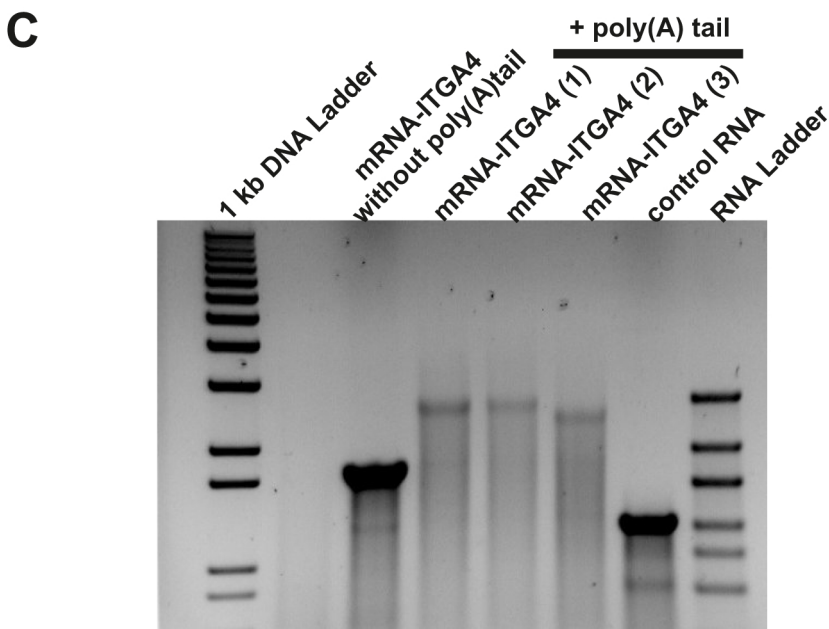

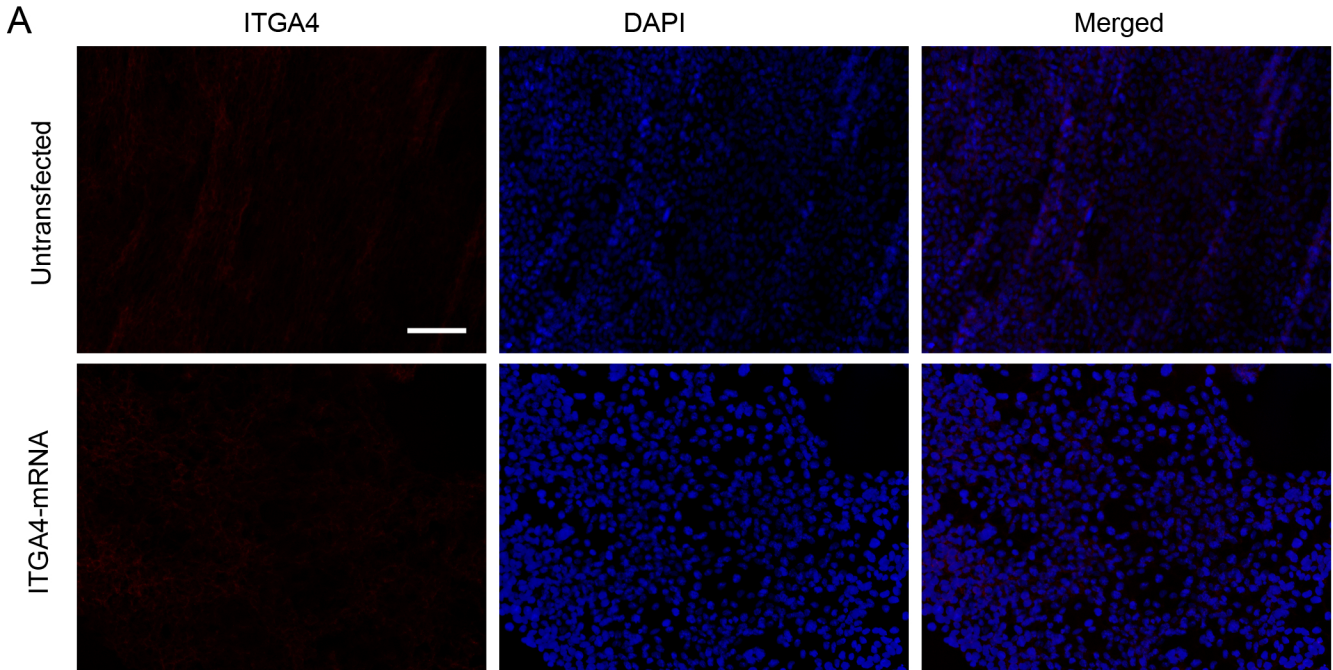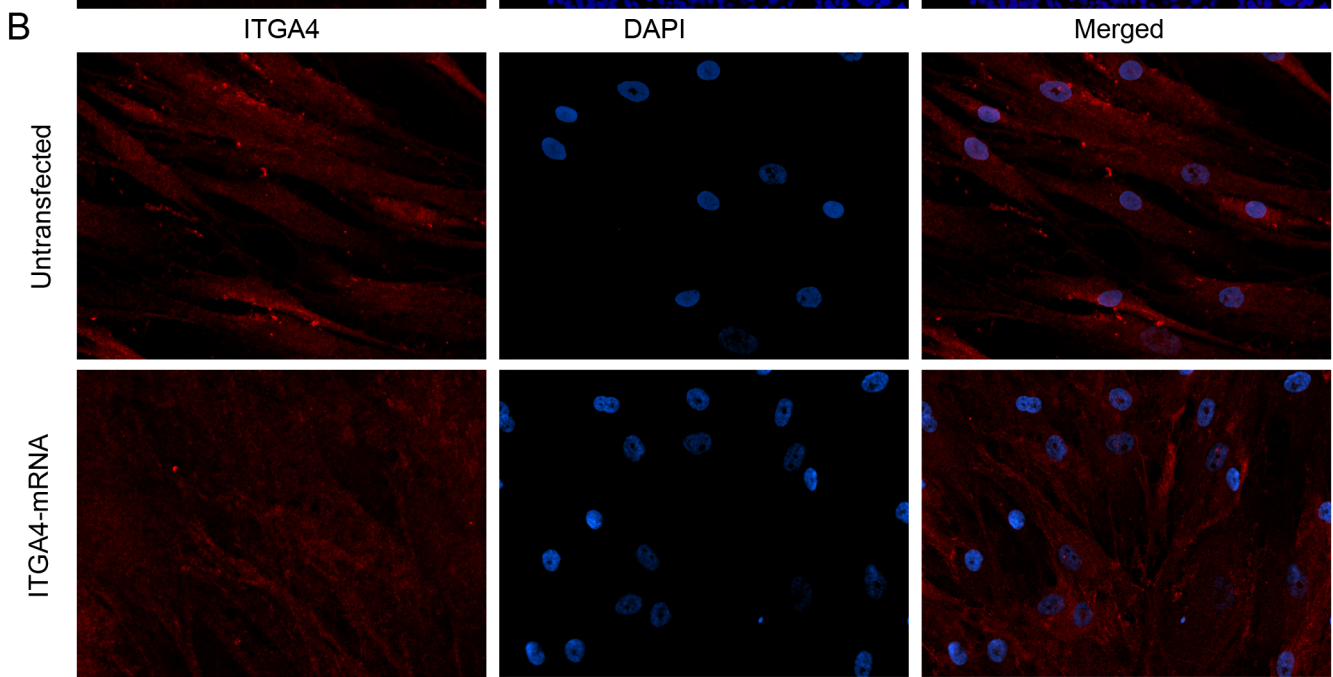

Supplement: 41598_2017_1304_MOESM1_ESM.pdf [file 41598_2017_1304_MOESM1_ESM.pdf]
